# Supplementary material
Source: HighWire-hosted journal article supplement (http://www.jneurosci.org/highwire/filestream/601149/field_highwire_adjunct_files/0/Supplemental_Figures.pdf)

Fig. S1

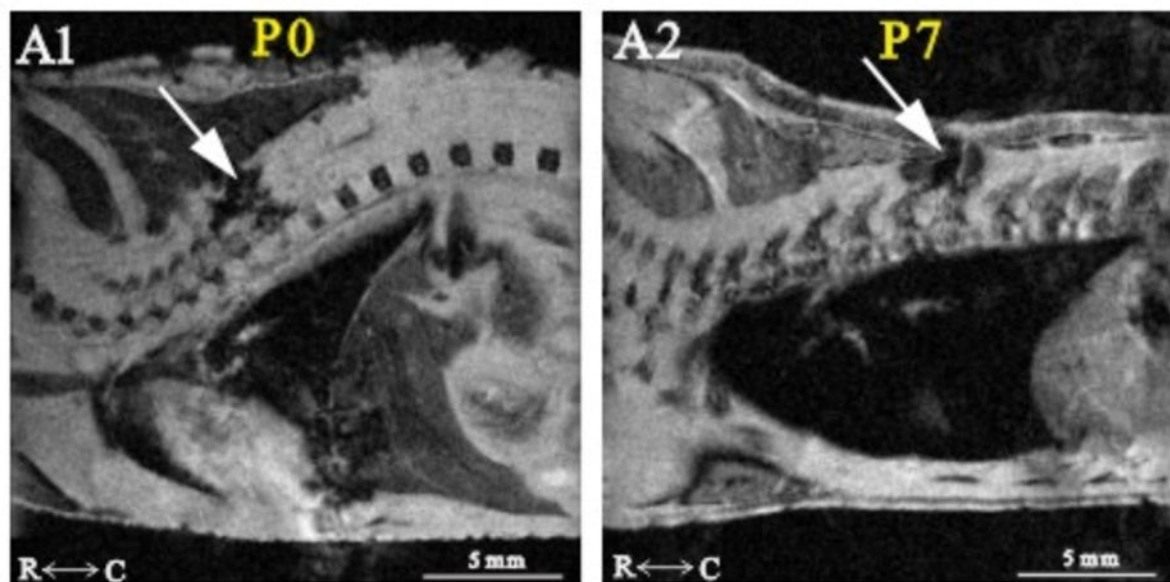

Fig. S2

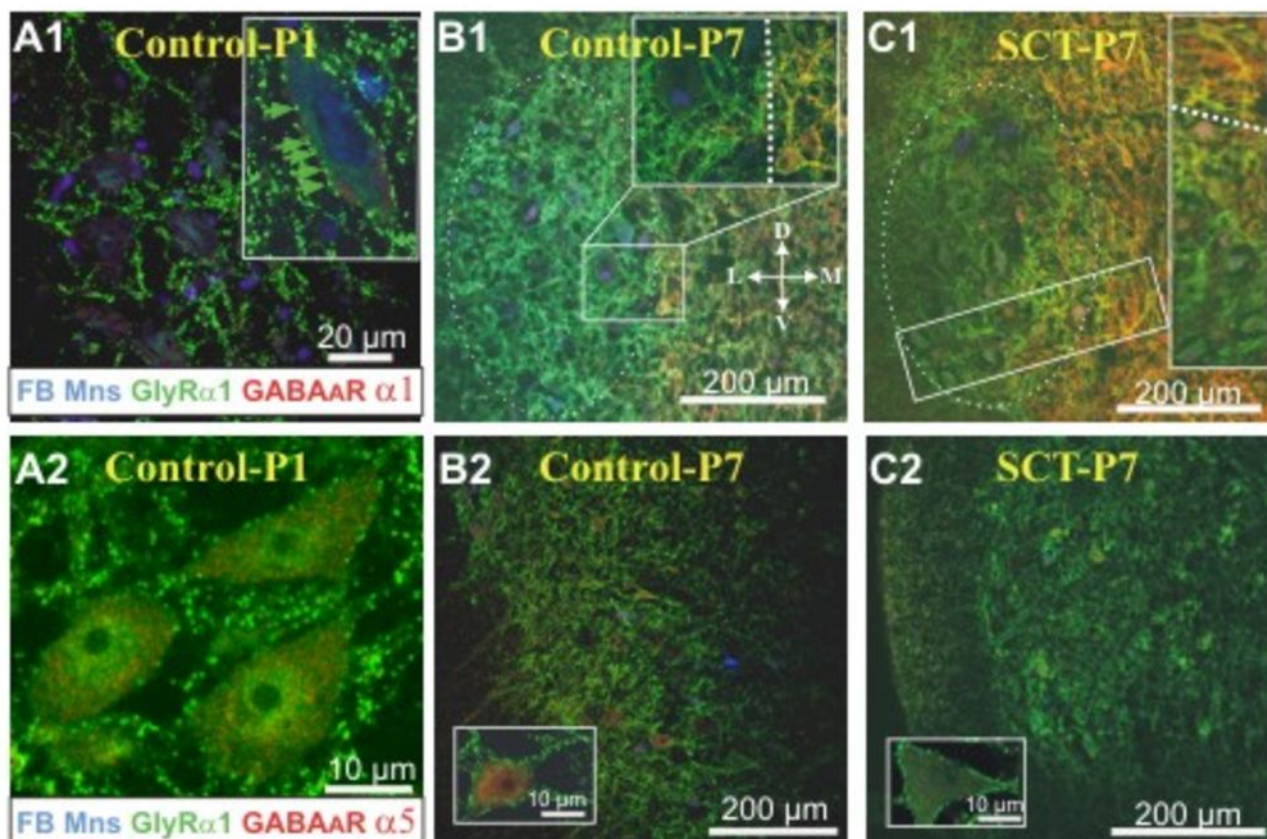

Supplement: Supplemental_Figures.pdf [file Supplemental_Figures.pdf]
